# Supplementary material for: Pre-existing population immunity and SARS-CoV-2 variant establishment and dominance dynamics in the United States: An ecological study
Source: bioRxiv or medRxiv preprint supplement (doi:10.1101/2022.07.01.22277157), 2022-07-02

# New England Region

## Massachusetts

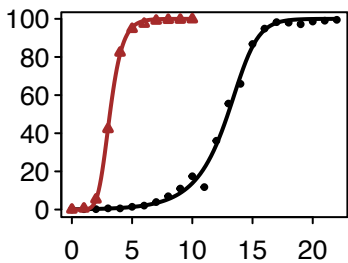

## Connecticut

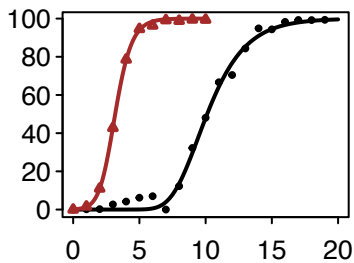

## Maine

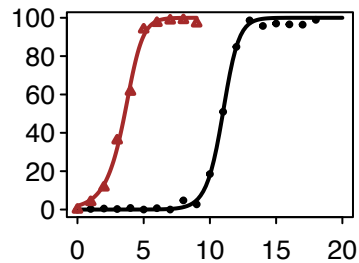

## New Hampshire

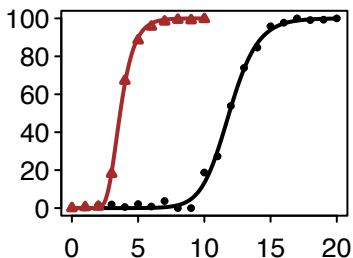

## Rhode Island

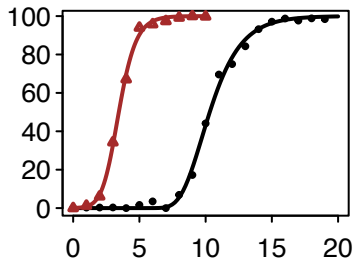

## Vermont

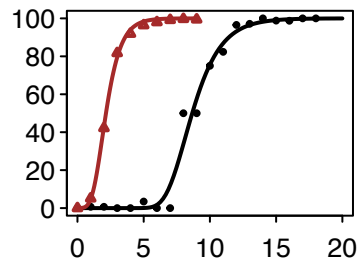

# Mid Atlantic Region

## New Jersey

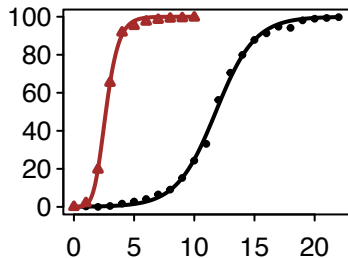

## New York

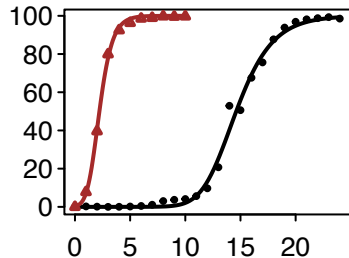

## Pennsylvania

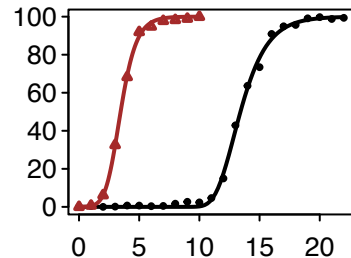

Variant proportion (%)

# Mountain Region

## Arizona

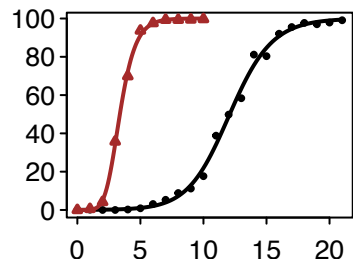

## Colorado

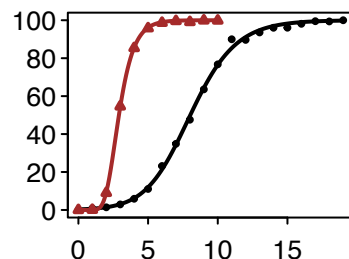

## Idaho

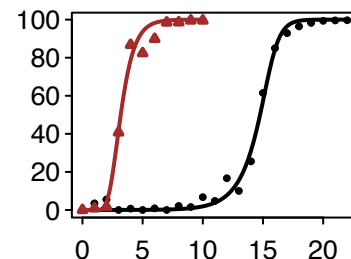

## New Mexico

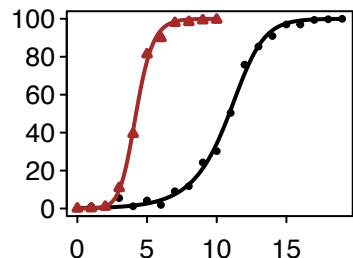

## Montana

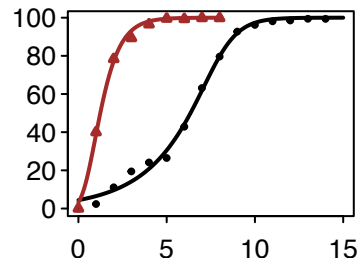

## Nevada

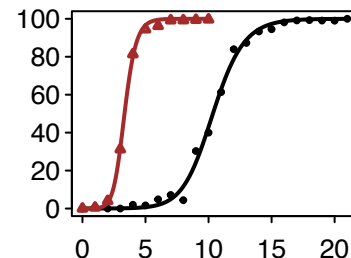

## Utah

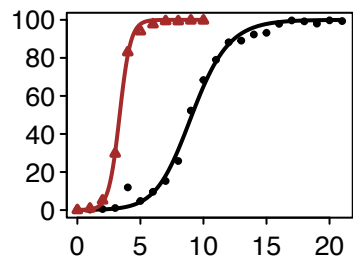

## Wyoming

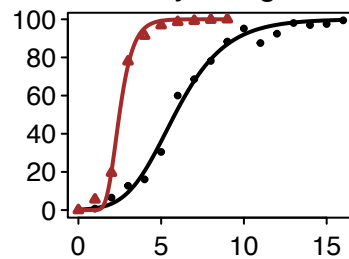

Legend:

Black circles: Delta

Red triangles: Omicron

Time since variant emergence (weeks)

# West North Central Region

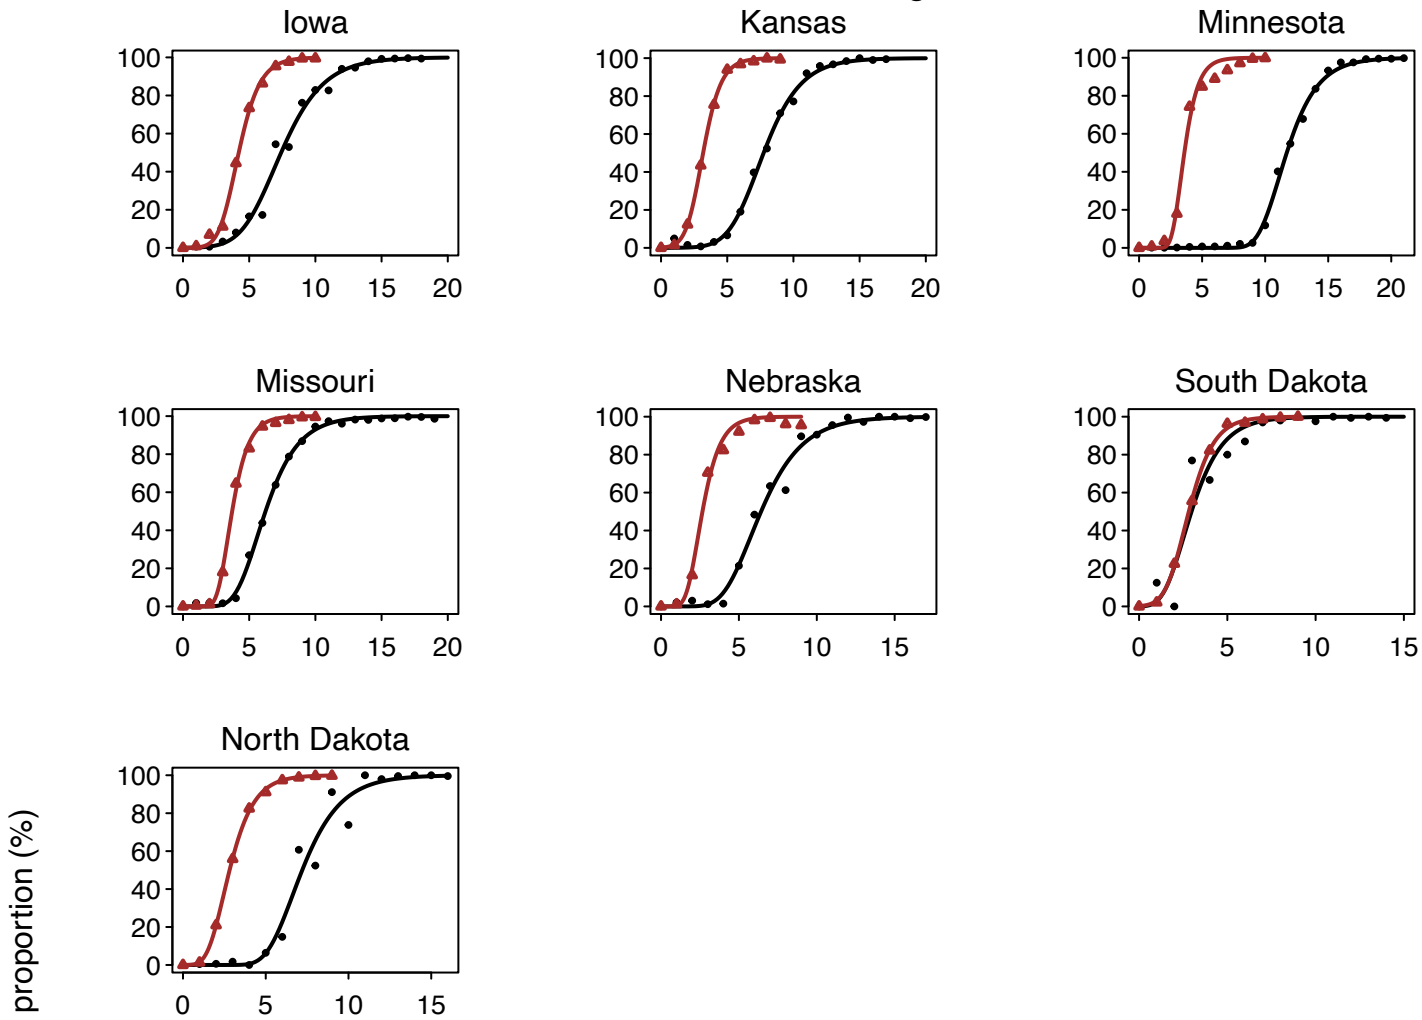

# South Atlantic Region

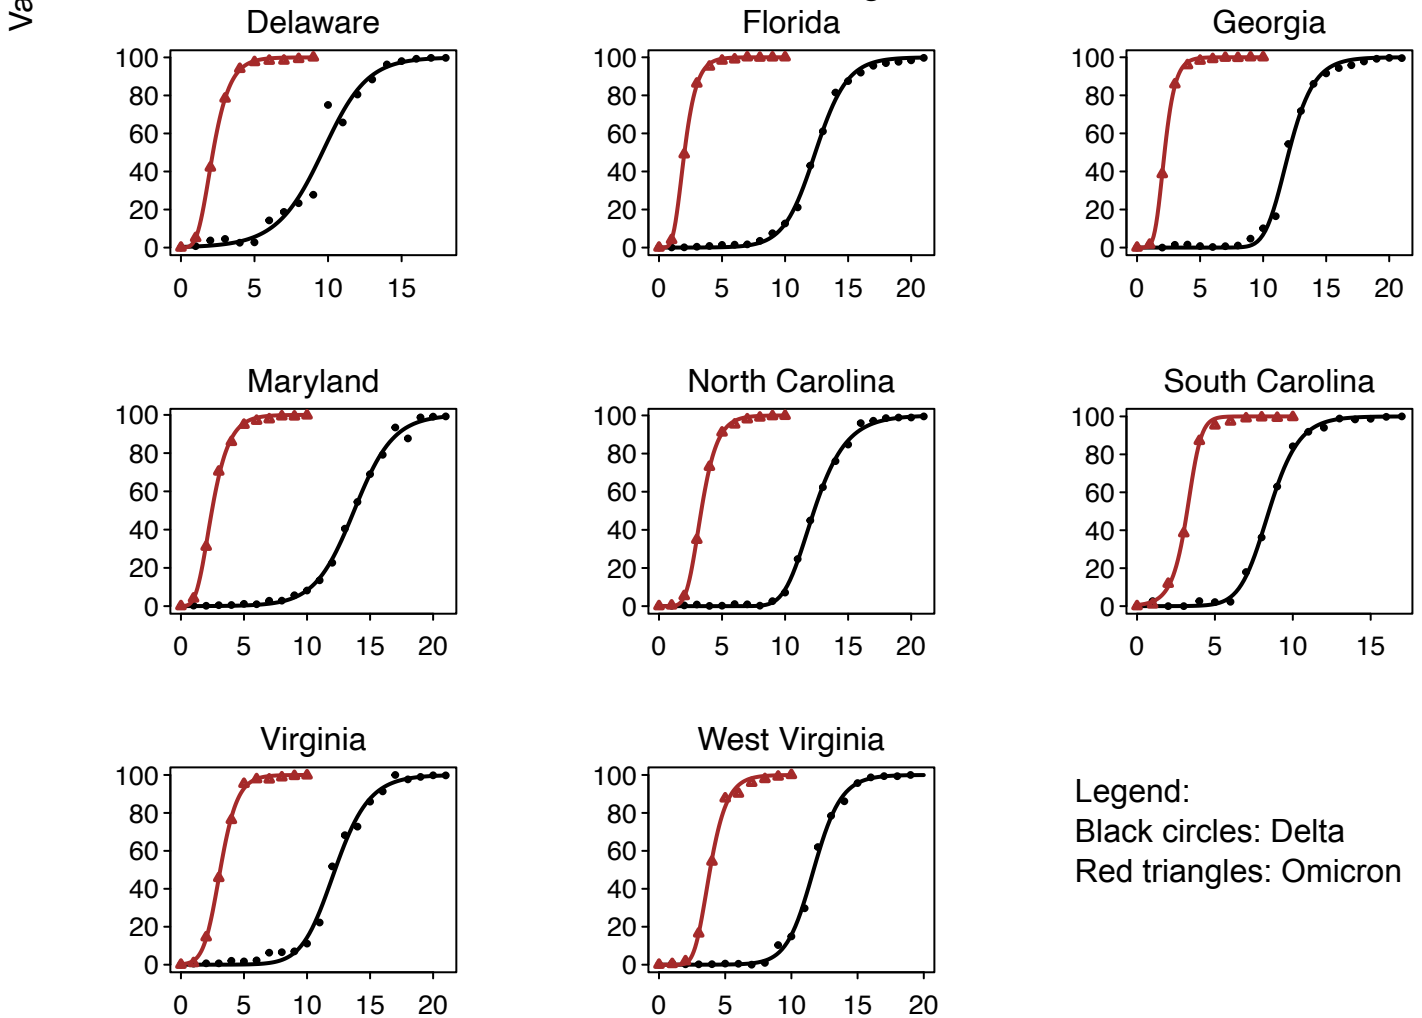

Legend:  
Black circles: Delta  
Red triangles: Omicron

Time since variant emergence (weeks)

# West South Central Region

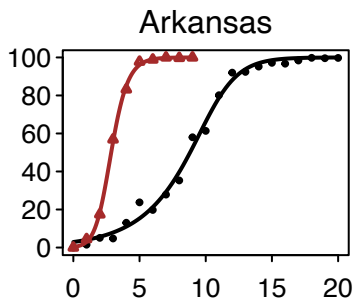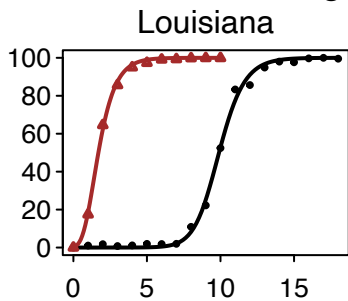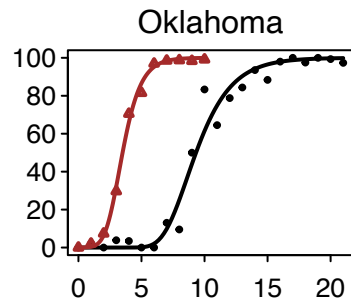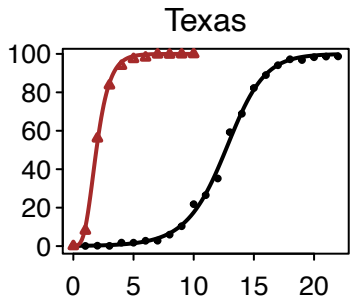

# East South Central Region

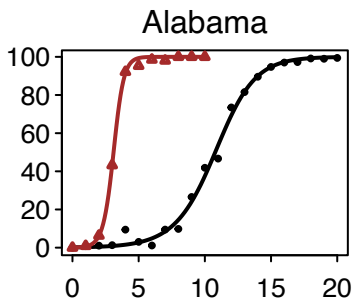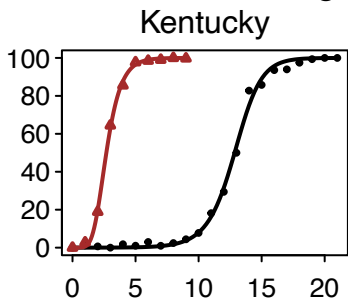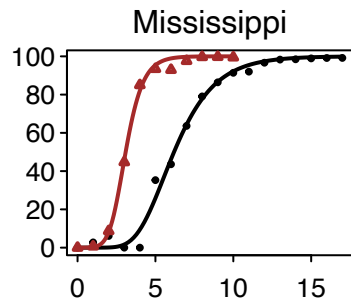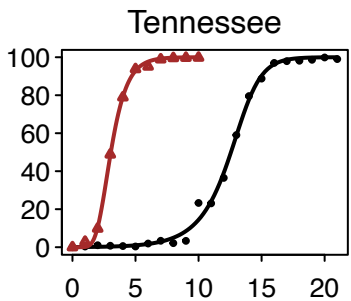

# East North Central Region

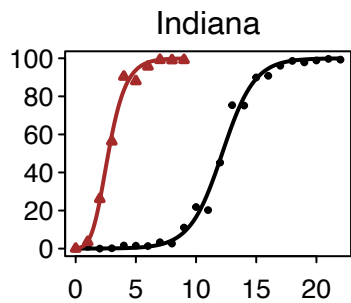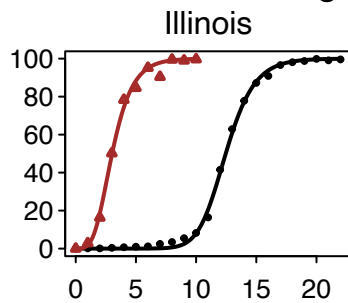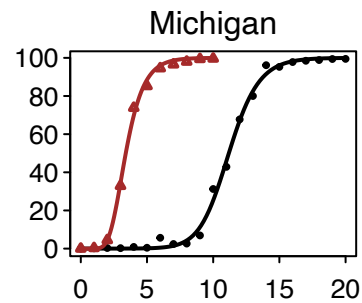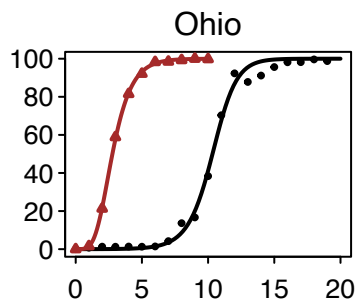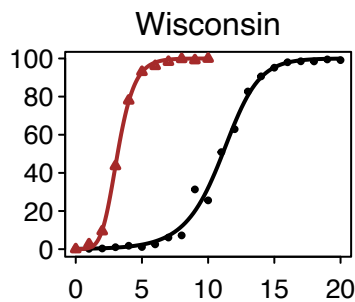

Legend:  
Black circles: Delta  
Red triangles: Omicron

Variant proportion (%)

Time since variant emergence (weeks)

# Pacific Region

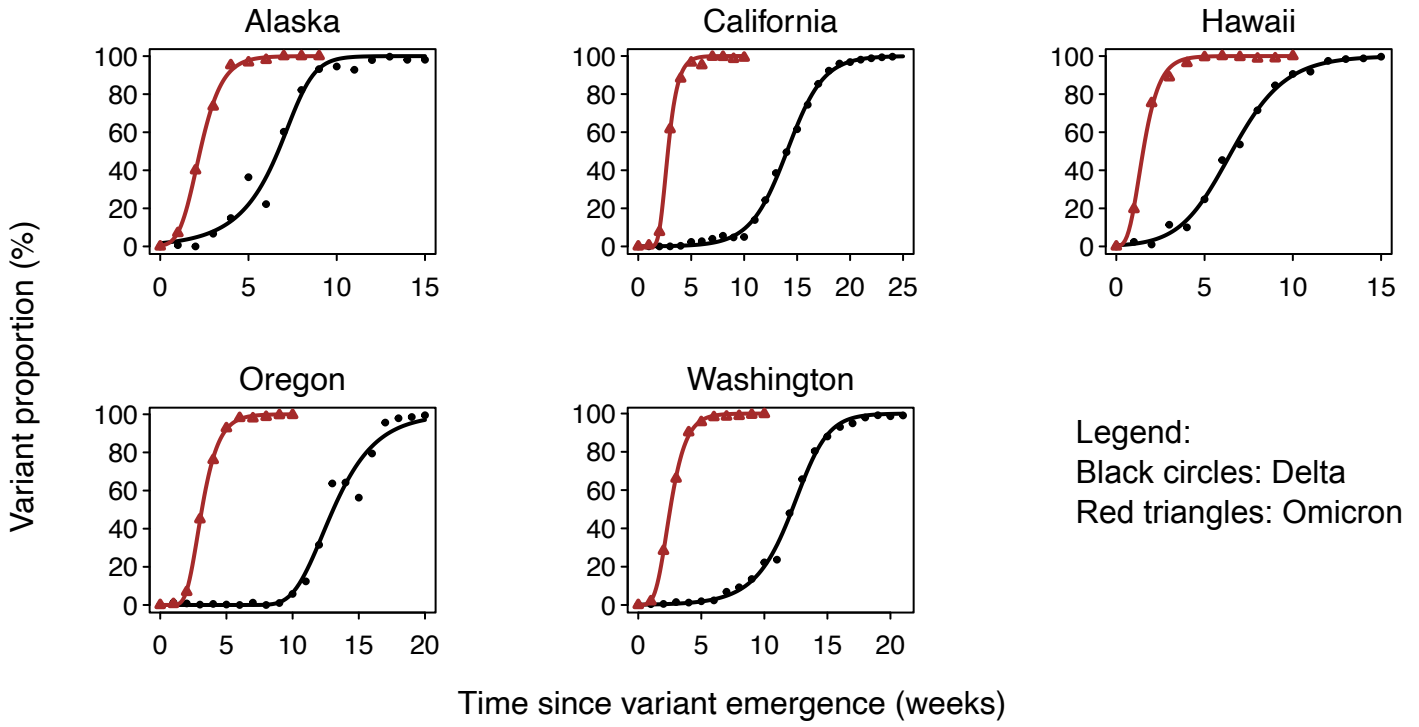

Supplement: Supplementary file [file media-1.pdf]
