# Supplementary material for: Pre-existing population immunity and SARS-CoV-2 variant establishment and dominance dynamics in the United States: An ecological study
Source: bioRxiv or medRxiv preprint supplement (doi:10.1101/2022.07.01.22277157), 2022-07-02

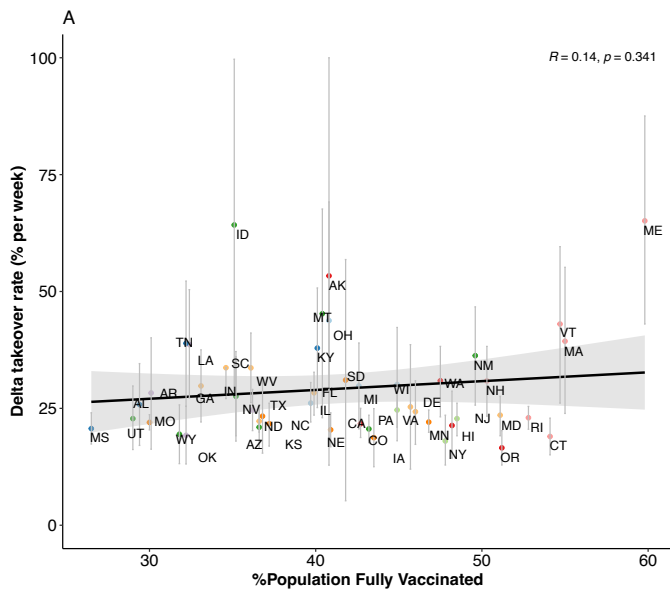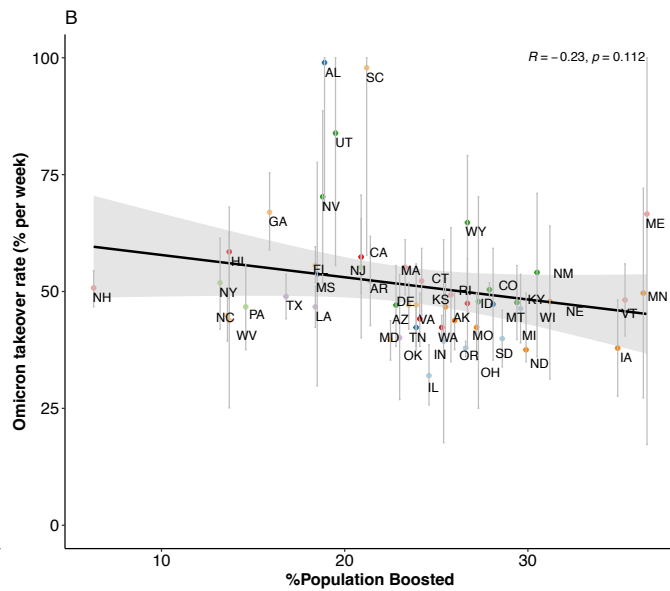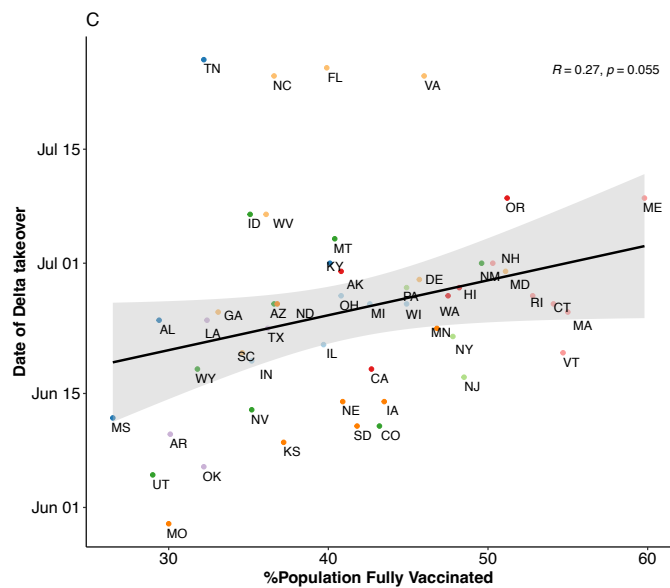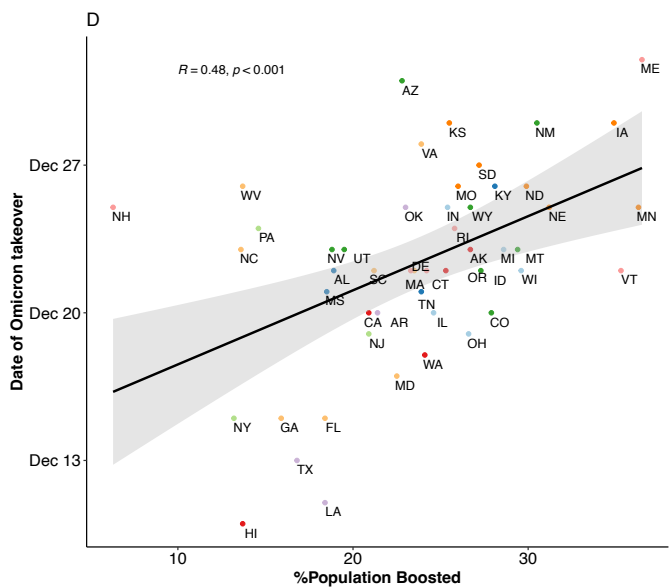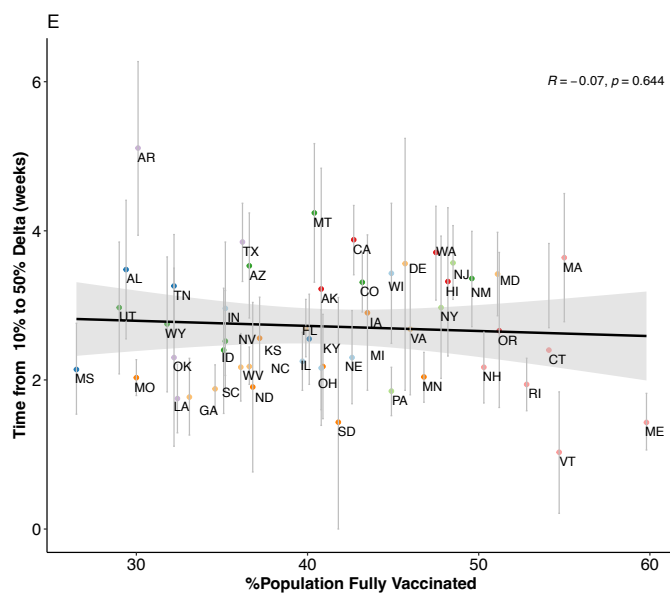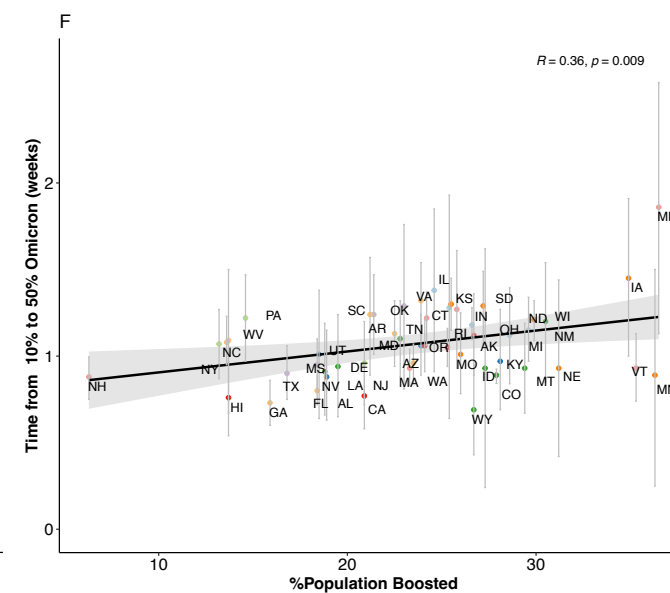

Supplement: Supplementary file [file media-2.pdf]
